# Supplementary material for: Biogeographical Ancestry Analyses Using the ForenSeqTM DNA Signature Prep Kit and Multiple Prediction Tools
Source: MDPI journal article supplement (doi:10.3390/genes15040510), 2024-04-18
Supplement: s1 [file s1]

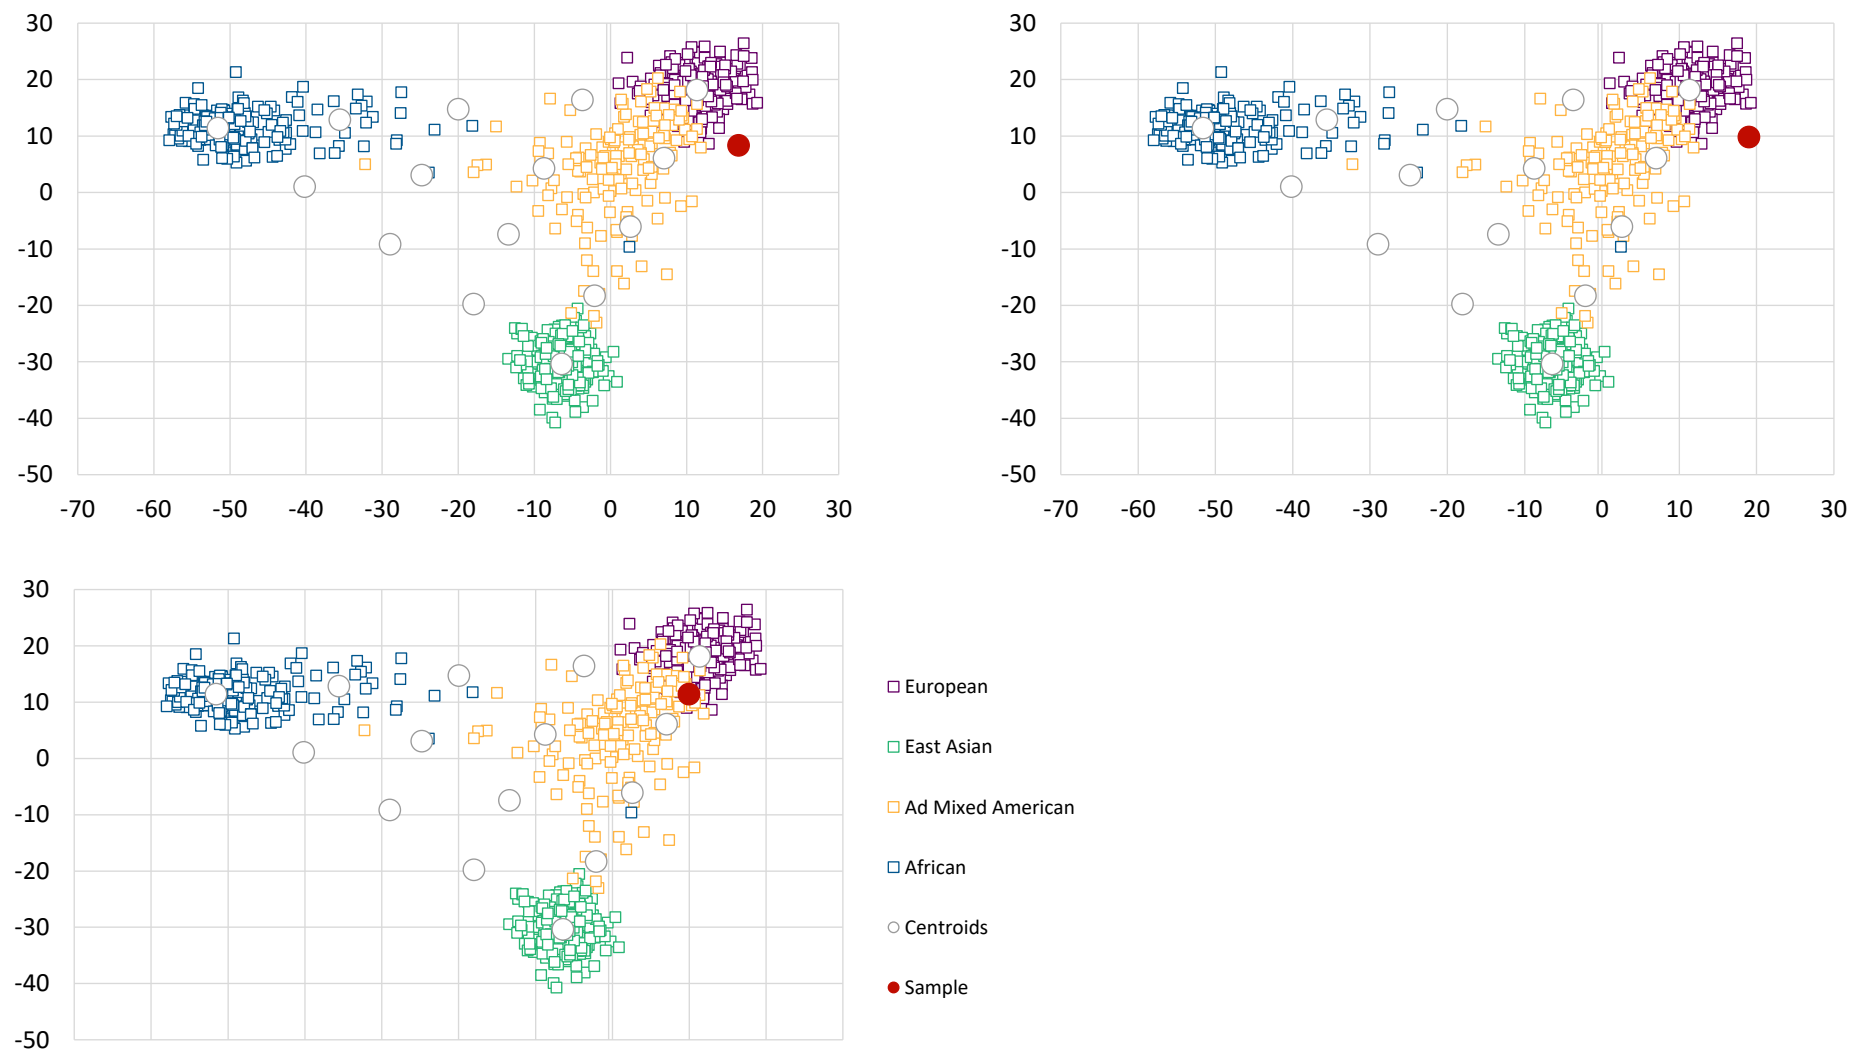

Figure S1: PCA plot obtained from the UAS, demonstrating predictions considered inconclusive

A

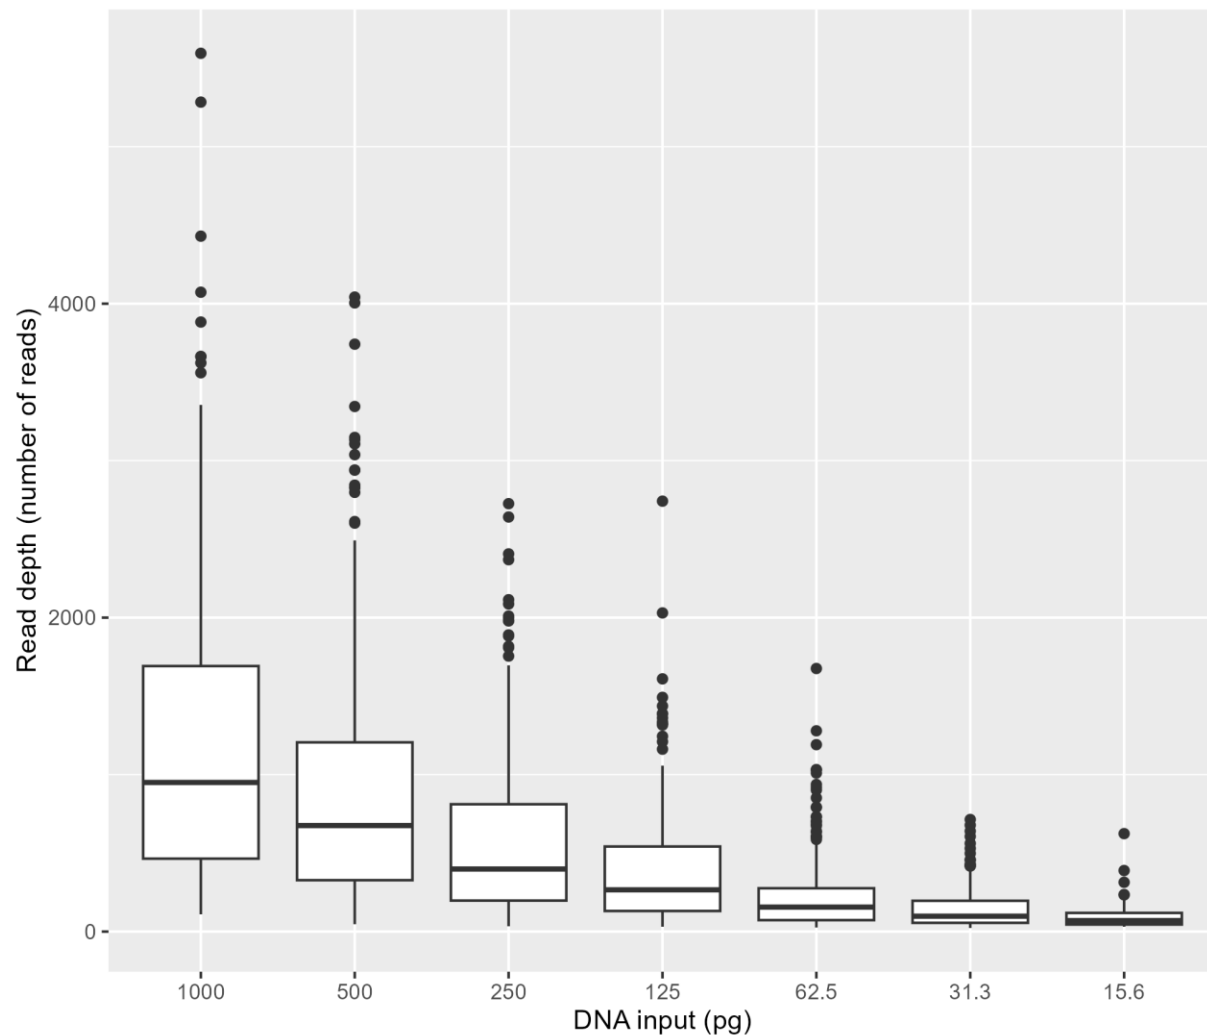

B

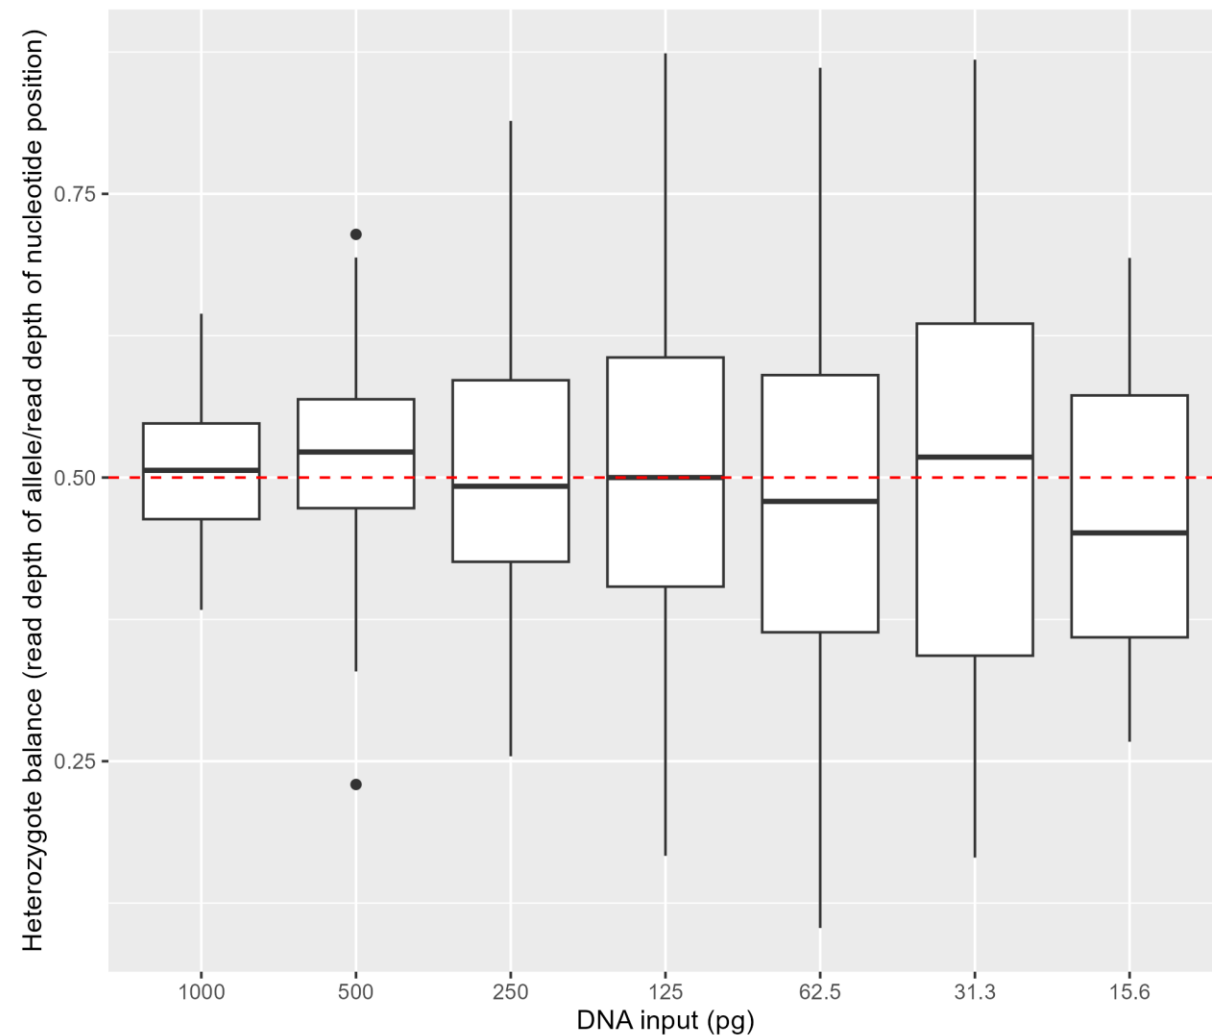

Figure S2: Sensitivity study of the 56 aiSNPs genotyped with the ForenSeq™ DNA Signature Prep Kit.

A) Read depth and B) heterozygote balance.

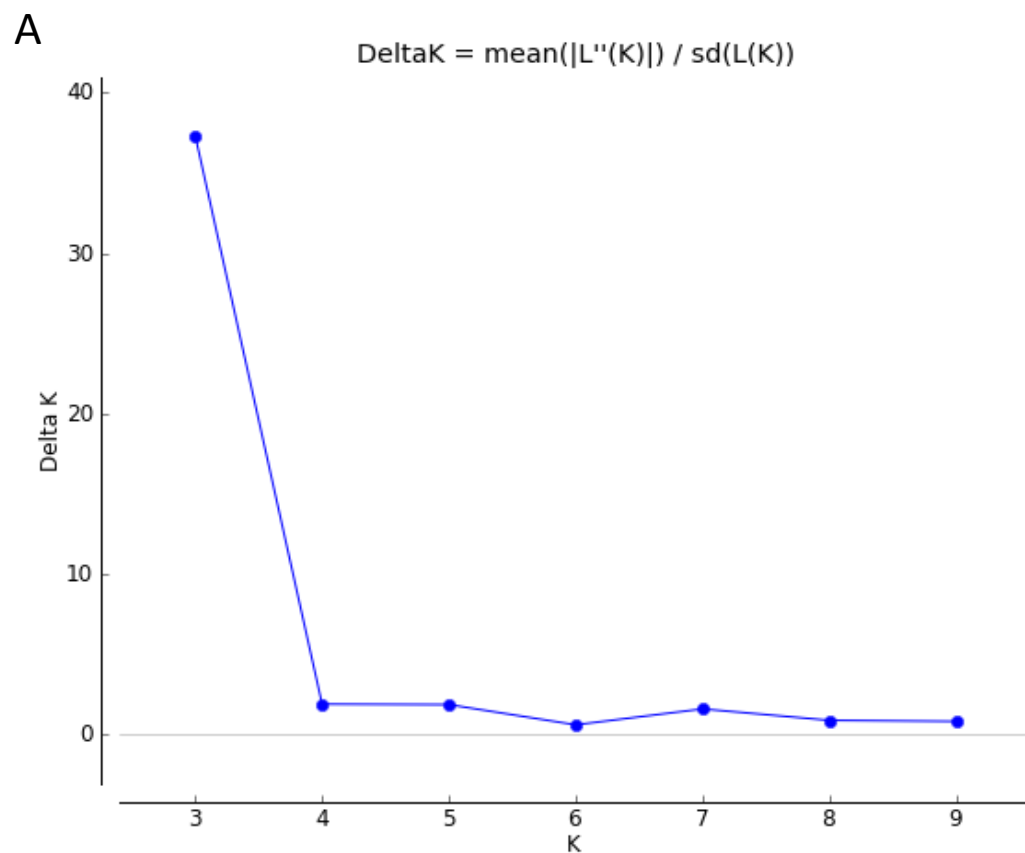

Figure S3: Delta  $K$  calculations (EVANNO et al., 2005) plotted using Structure Harvester on STRUCTURE results of the Norwegian reference population ( $n=200$ ) together with 31 other populations ( $n=2154$ ) (Table S1)
